# Supplementary material for: A super-high energy density asymmetric supercapacitor based on 3D core–shell structured NiCo-layered double hydroxide@carbon nanotube and activated polyaniline-derived carbon electrodes with commercial level mass loading
Source: Royal Society of Chemistry journal article supplement (doi:10.1039/c5ta01292a), 2015-01-01
Supplement: c5ta01292a4.pdf [file c5ta01292a4.pdf]

## Supporting information

**An asymmetric supercapacitor with super-high energy density based  
on 3D core-shell structured NiCo-layered double hydroxide@carbon  
nanotube and activated polyaniline-derived carbon electrodes with  
commercial level mass loading**

Xiaocheng Li,<sup>a,\*</sup> Juanjuan Shen,<sup>a,d</sup> Wei Sun<sup>a,c</sup>, Xuda Hong,<sup>b</sup> Rutao Wang,<sup>a</sup> Xinhong Zhao<sup>c</sup>, Xingbin  
Yan<sup>a</sup>

<sup>a</sup>Laboratory of Clean Energy Chemistry and Materials, Lanzhou Institute of Chemical  
Physics, Chinese Academy of Sciences, Lanzhou 730000, P. R. China

<sup>b</sup>Shenzhen Institute of Advanced Technology, Chinese Academy of Sciences, 518055,  
P. R. China.

<sup>c</sup>School of Petrochemical Engineering, Lanzhou University of Technology, Lanzhou  
730050, P. R. China.

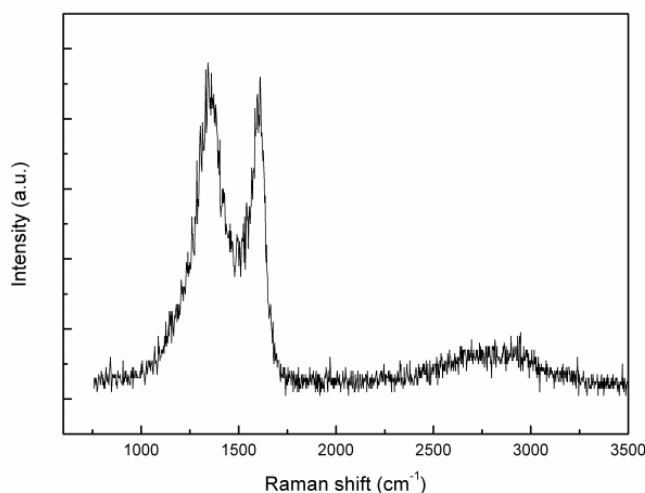

Fig. S1 Raman spectra of hairy layer on NF substrate

---

\*Corresponding author. Tel./fax: +86-931-4968040; Email: xiaocheng@licp.cas.cn

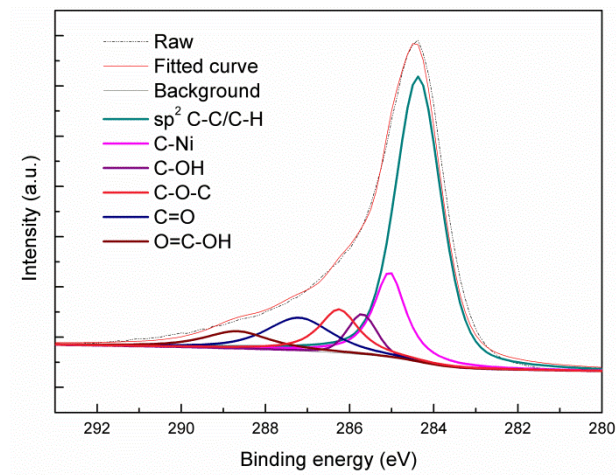

Fig. S2 C1s core level of the CNTs grown on NF substrate.

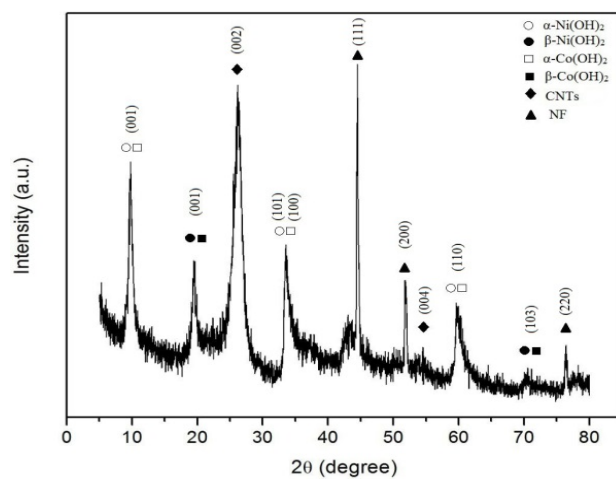

Fig. S3 XRD pattern of the as-prepared NiCo-LDH on CNT/NF composite substrate.

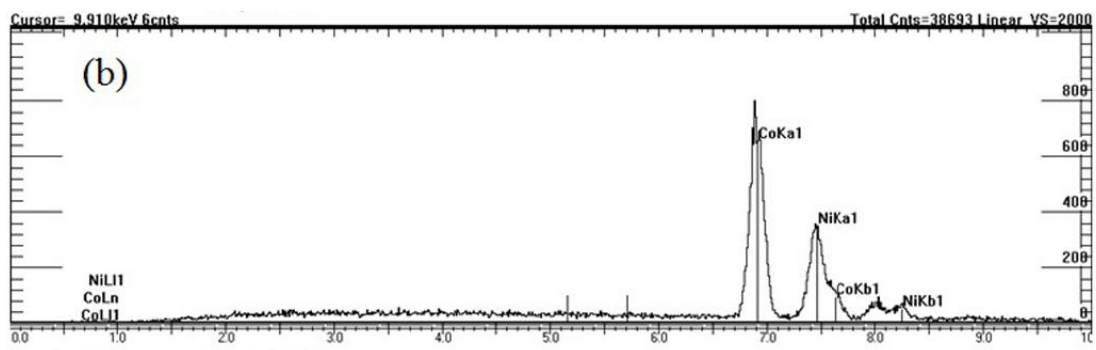

Fig. S4 EDS spectrum of NiCo-LDH

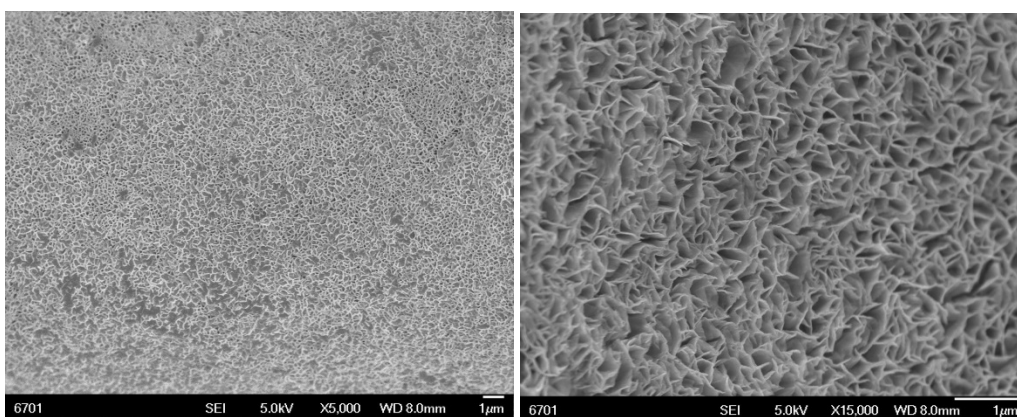

Fig. S5 FESEM images of NiCo-LDH/NF electrode: (a) over-view and (b) high magnification.

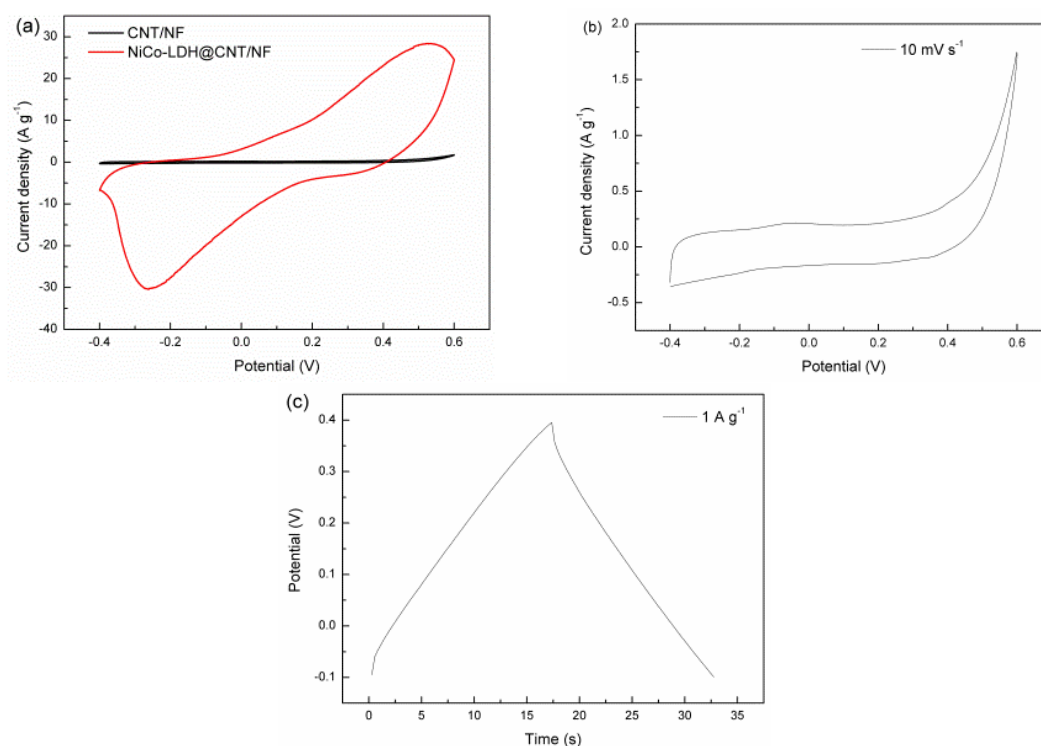

Fig. S6 Electrochemical properties of CNT/NF electrodes: (a) CV Comparison of CNT/NF and NiCo-LDH@CNT/NF electrodes at a scan rate of 10 mV s<sup>-1</sup>, (b) CV curve of CNT/NF electrode at a scan rate of 10 mV s<sup>-1</sup> and (c) charging/discharging curve of CNT/NF electrode at a current density of 1 A g<sup>-1</sup> within a potential window of -0.1 to 0.4V.
